# Supplementary material for: A Prior Usutu Virus Infection Can Protect Geese from Severe West Nile Disease
Source: Pathogens. 2023 Jul 20;12(7):959. doi: 10.3390/pathogens12070959 (PMC10386565; doi:10.3390/pathogens12070959)
Supplement: Supplementary file 1 [file pathogens-12-00959-s001.zip › Supplementary_Tables_S1-S15_07-07-2023.xlsx]

## Sheet: S1
Table S1.
Score sheet as an assessment criterion for the health status of the animals
daily assessment and scoring of:									assessment and scoring only on sampling days
Behavior									Eyes/Conjunctives
0 alert, curious,									0 pale pink
1 somewhat tired, reduced interest in the outside world,									1 reddened, clear secretion
2 tired, little interest in the outside world, reduced movement									2 strongly reddened, cloudy secretion
3 apathetic, no reaction, strongly reduced movement									3 strongly reddened, purulent secretion, vascular injection
Posture									Nutritional status (assessment of chest musculature)
0 relaxed posture, straight back-tail line, even load on both limbs.									0 chest musculature strongly pronounced
1 curved back									1 moderately pronounced pectoral musculature
2 curved up back, fluffed up plumage									2 weak musculature, sternum clearly perceptible
3 strongly curved up back, animal does not stand up									3 barely muscled, sternum already visible, cachexia
Breathing
0 breathing calm and regular
1 breathing occasionally uneven and slightly increased
2 breathing clearly uneven, clearly amplified breathing
3 breathing uneven, open beak, respiratory synchronous tail bobbing
Plumage
0 smooth, shiny, close-fitting plumage
1 dull plumage
2 dull plumage, featherless areas
3 dull, shaggy plumage, featherless areas, soiling
Appetite
0 greedy for offered food
1 eats offered food hesitantly
2 does not eat offered food, but smells it
3 does not eat, no interest in food
Fecal output/feces
0 amount of feces and uric acid content normal and formed
1 slight diarrhea/ increased watery portion
2 thin mushy diarrhea/change in consistency and beginning color change of uric acid content
3 strong change in consistency of the feces and strong change in color of the uric acid content
If an animal has a cumulative Score of >5 points or reach the maximum score of 3 in any category on any given day, a veterinarian should be called immediately and treatment initiated if necessary.
Animals with a cumulative score of more than 15 during the course of the experiment will be euthanized by exsanguination at the carotid arteries after isoflurane sedation.

## Sheet: S2
Table S2.
Clinical scores of geese (G), infected with USUV and/or WNV via subcutaneous injection
Clinical scores are possibly ranging from 0 to 4 (0 in white = healthy, 1 in yellow = mildly affected, 2 in orange = moderately affected, 3 in red = severely affected, and 4 in dark purple = death/euthanasia).
Dark grey fields indicate the birds taken out of the experiment according to the plan
	USUV	´-1 dpi	0 dpi	1 dpi	2 dpi	3 dpi	4 dpi	5 dpi	6 dpi	7 dpi	8 dpi	9 dpi	10 dpi	11 dpi	12 dpi	13 dpi	14 dpi	15 dpi	16 dpi	17 dpi	18 dpi	19 dpi	20 dpi	21 dpi	22 dpi	23 dpi	24 dpi	25 dpi	26 dpi	27 dpi	28 dpi	29 dpi	30 dpi	31 dpi	32 dpi	33 dpi	34 dpi	35 dpi	36 dpi	37 dpi	38 dpi
	WNV																				1 dpi	2 dpi	3 dpi	4 dpi	5 dpi	6 dpi	7 dpi	8 dpi	9 dpi	10 dpi	11 dpi	12 dpi	13 dpi	14 dpi	15 dpi	16 dpi	17 dpi	18 dpi	19 dpi	20 dpi	21 dpi
Behavior	G 20	0	0	0	0	0	0	0	0	0
	G 21	0	0	0	0	0	0	0	0	0
	G 22	0	0	0	0	0	0	0	0	0
	G 23	0	0	0	0	0	0	0	0	0	0	0	0	0	0	0	0	0	0	0	0	0	0	0	0	0	0	0	0	0	0	0	0	0	0	0	0	0	0	0
	G 24	0	0	0	0	0	0	0	0	0	0	0	0	0	0	0	0	0	0	0	0	0	0	0	0	0	0	0	0	0	0	0	0	0	0	0	0	0	0	0
	G 25	0	0	0	0	0	0	0	0	0	0	0	0	0	0	0	0	0	0	0	0	0	0	0	0	0	0	1	1	1	1	0	0	0	0	0	0	0	0	0		continuous calling, appears disoriented
	G 26	0	0	0	0	0	0	0	0	0	0	0	0	0	0	0	0	0	0	0	0	0	1																			isolated from the group
	G 27	0	0	0	0	0	0	0	0	0	0	0	0	0	0	0	0	0	0	0	0	0	0	0	0	0
	G 28	0	0	0	0	0	0	0	0	0	0	0	0	0	0	0	0	0	0	0	0	0	0	0	0	0
	G 29	0	0	0	0	0	0	0	0	0	0	0	0	0	0	0	0	0	0	0	0	0	0	0	0	0	0	0	0	0
	G 30	0	0	0	0	0	0	0	0	0	0	0	0	0	0	0	0	0	0	0	0	0	0	0	0	0	0	0	0	0
	G 31	0	0	0	0	0	0	0	0	0	0	0	0	0	0	0	0	0	0	0	0	0	0	0	0	0	0	0	0	0
	G 32	0	0	0	0	0	0	0	0	0	0	0	0	0	0	0	0	0	0	0	0	0	0
	G 33	0	0	0	0	0	0	0	0	0	0	0	0	0	0	0	0	0	0	0	0	0	0
	G 34	0	0	0	0	0	0	0	0	0	0	0	0	0	0	0	0	0	0	0	0	0	0
	G 35	0	0	0	0	0	0	0	0	0	0	0	0	0	0	0	0	0	0	0	0	0	0	0	0	0	0	0	0	0	0	0	0	0
	G 36	0	0	0	0	0	0	0	0	0	0	0	0	0	0	0	0	0	0	0	0	0	0	0	0	0	0	0	0	0	0	0	0	0
	G 37	0	0	0	0	0	0	0	0	0	0	0	0	0	0	0	0	0	0	0	0	0	0	0	0	0	0	0	0	0	0	0	0	0
	G 38	0	0	0	0	0	0	0	0	0	0	0	0	0	0	0	0	0	0	0	0	0	0	0	0	0	0	0	0	0	0	0	0	0	0	0	0	0	0	0	0
	G 39	0	0	0	0	0	0	0	0	0	0	0	0	0	0	0	0	0	0	0	0	0	0	0	0	0	0	0	0	0	0	0	0	0	0	0	0	0	0	0	0
	G 40	0	0	0	0	0	0	0	0	0	0	0	0	0	0	0	0	0	0	0	0	0	0	0	0	0	0	0	0	0	0	0	0	0	0	0	0	0	0	0	0
	G 41	0	0	0	0	0	0	0	0	0	0	0	0	0	0	0	0	0	0	0	0	0	0	0	0	0	0	0	0	0	0	0	0	0	0	0	0	0	0
	G 42	0	0	0	0	0	0	0	0	0	0	0	0	0	0	0	0	0	0	0	0	0	0	0	0	0	0	0	0	0	0	0	0	0	0	0	0	0	0
	G 43	0	0	0	0	0	0	0	0	0	0	0	0	0	0	0	0	0	0	0	0	0	0	0	0	0	0	0	0	0	0	0	0	0	0	0	0	0	0
Posture	G 20	0	0	0	0	0	0	0	0	0
	G 21	0	0	0	0	0	0	0	0	0
	G 22	0	0	0	0	0	0	0	0	0
	G 23	0	0	0	0	0	0	0	0	0	0	0	0	0	0	0	0	0	0	0	0	0	0	0	0	0	0	0	0	0	0	0	0	0	0	0	0	0	0	0
	G 24	0	0	0	0	0	0	0	0	0	0	0	0	0	0	0	0	0	0	0	0	0	0	0	0	0	0	0	0	0	0	0	0	0	0	0	0	0	0	0
	G 25	0	0	0	0	0	0	0	0	0	0	0	0	0	0	0	0	0	0	0	0	1	1	1	1	1	1	0	0	0	0	0	0	0	0	0	0	0	0	0		stands with its head to the wall
	G 26	0	0	0	0	0	0	0	0	1	0	1	1	1	1	1	1	1	1	1	1	1	1																			walks abducted, lies down more often
	G 27	0	0	0	0	0	0	0	0	0	0	0	0	0	0	0	0	0	0	0	0	0	0	0	0	0
	G 28	0	0	0	0	0	0	0	0	0	0	0	0	0	0	0	0	0	0	0	0	0	0	0	0	0
	G 29	0	0	0	0	0	0	0	0	0	0	0	0	0	0	0	0	0	0	0	0	0	0	0	0	0	0	0	0	0
	G 30	0	0	0	0	0	0	0	0	0	0	0	0	0	0	0	0	0	0	0	0	0	0	0	0	0	0	0	0	0
	G 31	0	0	0	0	0	0	0	0	0	0	0	0	0	0	0	0	0	0	0	0	0	0	0	0	0	0	0	0	0
	G 32	0	0	0	0	0	0	0	0	0	0	0	0	0	0	0	0	0	0	0	0	0	0
	G 33	0	0	0	0	0	0	0	0	0	0	0	0	0	0	0	0	0	0	0	0	0	0
	G 34	0	0	0	0	0	0	0	0	0	0	0	0	0	0	0	0	0	0	0	0	0	0	0	0	0
	G 35	0	0	0	0	0	0	0	0	0	0	0	0	0	0	0	0	0	0	0	0	0	0	0	0	0	0	0	0	0	0	0	0	0
	G 36	0	0	0	0	0	0	0	0	0	0	0	0	0	0	0	0	0	0	0	0	0	0	0	0	0	0	0	0	0	0	0	0	0
	G 37	0	0	0	0	0	0	0	0	0	0	0	0	0	0	0	0	0	0	0	0	0	0	0	0	0	0	0	0	0	0	0	0	0
	G 38	0	0	0	0	0	0	0	0	0	0	0	0	0	0	0	0	0	0	0	0	0	0	0	0	0	0	0	0	0	0	0	0	0	0	0	0	0	0	0	0
	G 39	0	0	0	0	0	0	0	0	0	0	0	0	0	0	0	0	0	0	0	0	0	0	0	0	0	0	0	0	0	0	0	0	0	0	0	0	0	0	0	0
	G 40	0	0	0	0	0	0	0	0	0	0	0	0	0	0	0	0	0	0	0	0	0	0	0	0	0	0	0	0	0	0	0	0	0	0	0	0	0	0	0	0
	G 41	0	0	0	0	0	0	0	0	0	0	0	0	0	0	0	0	0	0	0	0	0	0	0	0	0	0	0	0	0	0	0	0	0	0	0	0	0	0
	G 42	0	0	0	0	0	0	0	0	0	0	0	0	0	0	0	0	0	0	0	0	0	0	0	0	0	0	0	0	0	0	0	0	0	0	0	0	0	0
	G 43	0	0	0	0	0	0	0	0	0	0	0	0	0	0	0	0	0	0	0	0	0	0	0	0	0	0	0	0	0	0	0	0	0	0	0	0	0	0
Breathing	G 20	0	0	0	0	0	0	0	0	0
	G 21	0	0	0	0	0	0	0	0	0
	G 22	0	0	0	0	0	0	0	0	0
	G 23	0	0	0	0	0	0	0	0	0	0	0	0	0	0	0	0	0	0	0	0	0	0	0	0	0	0	0	0	0	0	0	0	0	0	0	0	0	0	0
	G 24	0	0	0	0	0	0	0	0	0	0	0	0	0	0	0	0	0	0	0	0	0	0	0	0	0	0	0	0	0	0	0	0	0	0	0	0	0	0	0
	G 25	0	0	0	0	0	0	0	0	0	0	0	0	0	0	0	0	0	0	0	0	0	0	0	0	0	0	0	0	0	0	0	0	0	0	0	0	0	0	0
	G 26	0	0	0	0	0	0	0	0	0	0	0	0	0	0	0	0	0	0	0	0	0	0
	G 27	0	0	0	0	0	0	0	0	0	0	0	0	0	0	0	0	0	0	0	0	0	0	0	0	0
	G 28	0	0	0	0	0	0	0	0	0	0	0	0	0	0	0	0	0	0	0	0	0	0	0	0	0
	G 29	0	0	0	0	0	0	0	0	0	0	0	0	0	0	0	0	0	0	0	0	0	0	0	0	0	0	0	0	0
	G 30	0	0	0	0	0	0	0	0	0	0	0	0	0	0	0	0	0	0	0	0	0	0	0	0	0	0	0	0	0
	G 31	0	0	0	0	0	0	0	0	0	0	0	0	0	0	0	0	0	0	0	0	0	0	0	0	0	0	0	0	0
	G 32	0	0	0	0	0	0	0	0	0	0	0	0	0	0	0	0	0	0	0	0	0	0
	G 33	0	0	0	0	0	0	0	0	0	0	0	0	0	0	0	0	0	0	0	0	0	0
	G 34	0	0	0	0	0	0	0	0	0	0	0	0	0	0	0	0	0	0	0	0	0	0	0	0	0
	G 35	0	0	0	0	0	0	0	0	0	0	0	0	0	0	0	0	0	0	0	0	0	0	0	0	0	0	0	0	0	0	0	0	0
	G 36	0	0	0	0	0	0	0	0	0	0	0	0	0	0	0	0	0	0	0	0	0	0	0	0	0	0	0	0	0	0	0	0	0
	G 37	0	0	0	0	0	0	0	0	0	0	0	0	0	0	0	0	0	0	0	0	0	0	0	0	0	0	0	0	0	0	0	0	0
	G 38	0	0	0	0	0	0	0	0	0	0	0	0	0	0	0	0	0	0	0	0	0	0	0	0	0	0	0	0	0	0	0	0	0	0	0	0	0	0	0	0
	G 39	0	0	0	0	0	0	0	0	0	0	0	0	0	0	0	0	0	0	0	0	0	0	0	0	0	0	0	0	0	0	0	0	0	0	0	0	0	0	0	0
	G 40	0	0	0	0	0	0	0	0	0	0	0	0	0	0	0	0	0	0	0	0	0	0	0	0	0	0	0	0	0	0	0	0	0	0	0	0	0	0	0	0
	G 41	0	0	0	0	0	0	0	0	0	0	0	0	0	0	0	0	0	0	0	0	0	0	0	0	0	0	0	0	0	0	0	0	0	0	0	0	0	0
	G 42	0	0	0	0	0	0	0	0	0	0	0	0	0	0	0	0	0	0	0	0	0	0	0	0	0	0	0	0	0	0	0	0	0	0	0	0	0	0
	G 43	0	0	0	0	0	0	0	0	0	0	0	0	0	0	0	0	0	0	0	0	0	0	0	0	0	0	0	0	0	0	0	0	0	0	0	0	0	0
Plumage	G 20	0	0	0	0	0	0	0	0	0
	G 21	0	0	0	0	0	0	0	0	0
	G 22	0	0	0	0	0	0	0	0	0
	G 23	0	0	0	0	0	0	0	0	0	0	0	0	0	0	0	0	0	0	0	0	0	0	0	0	0	0	0	0	0	0	0	0	0	0	0	0	0	0	0
	G 24	0	0	0	0	0	0	0	0	0	0	0	0	0	0	0	0	0	0	0	0	0	0	0	0	0	0	0	0	0	0	0	0	0	0	0	0	0	0	0
	G 25	0	0	0	0	0	0	0	0	0	0	0	0	0	0	0	0	0	0	0	0	0	0	0	0	0	0	0	0	0	0	0	0	0	0	0	0	0	0	0
	G 26	0	0	0	0	0	0	0	0	0	0	0	0	0	0	0	0	0	0	0	0	0	1
	G 27	0	0	0	0	0	0	0	0	0	0	0	0	0	0	0	0	0	0	0	0	0	0	0	0	0
	G 28	0	0	0	0	0	0	0	0	0	0	0	0	0	0	0	0	0	0	0	0	0	0	0	0	0
	G 29	0	0	0	0	0	0	0	0	0	0	0	0	0	0	0	0	0	0	0	0	0	0	0	0	0	0	0	0	0
	G 30	0	0	0	0	0	0	0	0	0	0	0	0	0	0	0	0	0	0	0	0	0	0	0	0	0	0	0	0	0
	G 31	0	0	0	0	0	0	0	0	0	0	0	0	0	0	0	0	0	0	0	0	0	0	0	0	0	0	0	0	0
	G 32	0	0	0	0	0	0	0	0	0	0	0	0	0	0	0	0	0	0	0	0	0	0
	G 33	0	0	0	0	0	0	0	0	0	0	0	0	0	0	0	0	0	0	0	0	0	0
	G 34	0	0	0	0	0	0	0	0	0	0	0	0	0	0	0	0	0	0	0	0	0	0	0	0	0
	G 35	0	0	0	0	0	0	0	0	0	0	0	0	0	0	0	0	0	0	0	0	0	0	0	0	0	0	0	0	0	0	0	0	0
	G 36	0	0	0	0	0	0	0	0	0	0	0	0	0	0	0	0	0	0	0	0	0	0	0	0	0	0	0	0	0	0	0	0	0
	G 37	0	0	0	0	0	0	0	0	0	0	0	0	0	0	0	0	0	0	0	0	0	0	0	0	0	0	0	0	0	0	0	0	0
	G 38	0	0	0	0	0	0	0	0	0	0	0	0	0	0	0	0	0	0	0	0	0	0	0	0	0	0	0	0	0	0	0	0	0	0	0	0	0	0	0	0
	G 39	0	0	0	0	0	0	0	0	0	0	0	0	0	0	0	0	0	0	0	0	0	0	0	0	0	0	0	0	0	0	0	0	0	0	0	0	0	0	0	0
	G 40	0	0	0	0	0	0	0	0	0	0	0	0	0	0	0	0	0	0	0	0	0	0	0	0	0	0	0	0	0	0	0	0	0	0	0	0	0	0	0	0
	G 41	0	0	0	0	0	0	0	0	0	0	0	0	0	0	0	0	0	0	0	0	0	0	0	0	0	0	0	0	0	0	0	0	0	0	0	0	0	0
	G 42	0	0	0	0	0	0	0	0	0	0	0	0	0	0	0	0	0	0	0	0	0	0	0	0	0	0	0	0	0	0	0	0	0	0	0	0	0	0
	G 43	0	0	0	0	0	0	0	0	0	0	0	0	0	0	0	0	0	0	0	0	0	0	0	0	0	0	0	0	0	0	0	0	0	0	0	0	0	0
Appetite	G 20	0	0	0	0	0	0	0	0	0
	G 21	0	0	0	0	0	0	0	0	0
	G 22	0	0	0	0	0	0	0	0	0
	G 23	0	0	0	0	0	0	0	0	0	0	0	0	0	0	0	0	0	0	0	0	0	0	0	0	0	0	0	0	0	0	0	0	0	0	0	0	0	0	0
	G 24	0	0	0	0	0	0	0	0	0	0	0	0	0	0	0	0	0	0	0	0	0	0	0	0	0	0	0	0	0	0	0	0	0	0	0	0	0	0	0
	G 25	0	0	0	0	0	0	0	0	0	0	0	0	0	0	0	0	0	0	0	0	0	0	0	0	0	0	0	0	0	0	0	0	0	0	0	0	0	0	0
	G 26	0	0	0	0	0	0	0	0	0	0	0	0	0	0	0	0	0	0	0	0	0	0
	G 27	0	0	0	0	0	0	0	0	0	0	0	0	0	0	0	0	0	0	0	0	0	0	0	0	0
	G 28	0	0	0	0	0	0	0	0	0	0	0	0	0	0	0	0	0	0	0	0	0	0	0	0	0
	G 29	0	0	0	0	0	0	0	0	0	0	0	0	0	0	0	0	0	0	0	0	0	0	0	0	0	0	0	0	0
	G 30	0	0	0	0	0	0	0	0	0	0	0	0	0	0	0	0	0	0	0	0	0	0	0	0	0	0	0	0	0
	G 31	0	0	0	0	0	0	0	0	0	0	0	0	0	0	0	0	0	0	0	0	0	0	0	0	0	0	0	0	0
	G 32	0	0	0	0	0	0	0	0	0	0	0	0	0	0	0	0	0	0	0	0	0	0
	G 33	0	0	0	0	0	0	0	0	0	0	0	0	0	0	0	0	0	0	0	0	0	0
	G 34	0	0	0	0	0	0	0	0	0	0	0	0	0	0	0	0	0	0	0	0	0	0	0	0	0
	G 35	0	0	0	0	0	0	0	0	0	0	0	0	0	0	0	0	0	0	0	0	0	0	0	0	0	0	0	0	0	0	0	0	0
	G 36	0	0	0	0	0	0	0	0	0	0	0	0	0	0	0	0	0	0	0	0	0	0	0	0	0	0	0	0	0	0	0	0	0
	G 37	0	0	0	0	0	0	0	0	0	0	0	0	0	0	0	0	0	0	0	0	0	0	0	0	0	0	0	0	0	0	0	0	0
	G 38	0	0	0	0	0	0	0	0	0	0	0	0	0	0	0	0	0	0	0	0	0	0	0	0	0	0	0	0	0	0	0	0	0	0	0	0	0	0	0	0
	G 39	0	0	0	0	0	0	0	0	0	0	0	0	0	0	0	0	0	0	0	0	0	0	0	0	0	0	0	0	0	0	0	0	0	0	0	0	0	0	0	0
	G 40	0	0	0	0	0	0	0	0	0	0	0	0	0	0	0	0	0	0	0	0	0	0	0	0	0	0	0	0	0	0	0	0	0	0	0	0	0	0	0	0
	G 41	0	0	0	0	0	0	0	0	0	0	0	0	0	0	0	0	0	0	0	0	0	0	0	0	0	0	0	0	0	0	0	0	0	0	0	0	0	0
	G 42	0	0	0	0	0	0	0	0	0	0	0	0	0	0	0	0	0	0	0	0	0	0	0	0	0	0	0	0	0	0	0	0	0	0	0	0	0	0
	G 43	0	0	0	0	0	0	0	0	0	0	0	0	0	0	0	0	0	0	0	0	0	0	0	0	0	0	0	0	0	0	0	0	0	0	0	0	0	0
Feces	G 20	0	0	0	0	0	0	0	0	0
	G 21	0	0	0	0	0	0	0	0	0
	G 22	0	0	0	0	0	0	0	0	0
	G 23	0	0	0	0	0	0	0	0	0	0	0	0	0	0	0	0	0	0	0	0	0	0	0	0	0	0	0	0	0	0	0	0	0	0	0	0	0	0	0
	G 24	0	0	0	0	0	0	0	0	0	0	0	0	0	0	0	0	0	0	0	0	0	0	0	0	0	0	0	0	0	0	0	0	0	0	0	0	0	0	0
	G 25	0	0	0	0	0	0	0	0	0	0	0	0	0	0	0	0	0	0	0	0	0	0	0	0	0	0	0	0	0	0	0	0	0	0	0	0	0	0	0
	G 26	0	0	0	0	0	0	0	0	0	0	0	0	0	0	0	0	0	0	0	0	0	0
	G 27	0	0	0	0	0	0	0	0	0	0	0	0	0	0	0	0	0	0	0	0	0	0	0	0	0
	G 28	0	0	0	0	0	0	0	0	0	0	0	0	0	0	0	0	0	0	0	0	0	0	0	0	0
	G 29	0	0	0	0	0	0	0	0	0	0	0	0	0	0	0	0	0	0	0	0	0	0	0	0	0	0	0	0	0
	G 30	0	0	0	0	0	0	0	0	0	0	0	0	0	0	0	0	0	0	0	0	0	0	0	0	0	0	0	0	0
	G 31	0	0	0	0	0	0	0	0	0	0	0	0	0	0	0	0	0	0	0	0	0	0	0	0	0	0	0	0	0
	G 32	0	0	0	0	0	0	0	0	0	0	0	0	0	0	0	0	0	0	0	0	0	0
	G 33	0	0	0	0	0	0	0	0	0	0	0	0	0	0	0	0	0	0	0	0	0	0
	G 34	0	0	0	0	0	0	0	0	0	0	0	0	0	0	0	0	0	0	0	0	0	0	0	0	0
	G 35	0	0	0	0	0	0	0	0	0	0	0	0	0	0	0	0	0	0	0	0	0	0	0	0	0	0	0	0	0	0	0	0	0
	G 36	0	0	0	0	0	0	0	0	0	0	0	0	0	0	0	0	0	0	0	0	0	0	0	0	0	0	0	0	0	0	0	0	0
	G 37	0	0	0	0	0	0	0	0	0	0	0	0	0	0	0	0	0	0	0	0	0	0	0	0	0	0	0	0	0	0	0	0	0
	G 38	0	0	0	0	0	0	0	0	0	0	0	0	0	0	0	0	0	0	0	0	0	0	0	0	0	0	0	0	0	0	0	0	0	0	0	0	0	0	0	0
	G 39	0	0	0	0	0	0	0	0	0	0	0	0	0	0	0	0	0	0	0	0	0	0	0	0	0	0	0	0	0	0	0	0	0	0	0	0	0	0	0	0
	G 40	0	0	0	0	0	0	0	0	0	0	0	0	0	0	0	0	0	0	0	0	0	0	0	0	0	0	0	0	0	0	0	0	0	0	0	0	0	0	0	0
	G 41	0	0	0	0	0	0	0	0	0	0	0	0	0	0	0	0	0	0	0	0	0	0	0	0	0	0	0	0	0	0	0	0	0	0	0	0	0	0
	G 42	0	0	0	0	0	0	0	0	0	0	0	0	0	0	0	0	0	0	0	0	0	0	0	0	0	0	0	0	0	0	0	0	0	0	0	0	0	0
	G 43	0	0	0	0	0	0	0	0	0	0	0	0	0	0	0	0	0	0	0	0	0	0	0	0	0	0	0	0	0	0	0	0	0	0	0	0	0	0
Assessment only on sampling/weighing dates	USUV	´-1 dpi	0 dpi	2 dpi	3 dpi	4 dpi	5 dpi	7 dpi	10 dpi	13 dpi	16 dpi	17 dpi	18 dpi	19 dpi	20 dpi	21 dpi	22 dpi	23 dpi	24 dpi	25 dpi	27 dpi	29 dpi	31 dpi	36 dpi	38 dpi
	WNV												1 dpi	2 dpi	3 dpi	4 dpi	5 dpi	6 dpi	7 dpi	8 dpi	10 dpi	12 dpi	14 dpi	19 dpi	21 dpi
Eyes	G 26	0	0	0	0	0	0	0	0	0	0	0	0	0	0
	G 27	0	0	0	0	0	0	0	0	0	0	0	0	0	0	0	0	0
	G 28	0	0	0	0	0	0	0	0	0	0	0	0	0	0	0	0	0
	G 29	0	0	0	0	0	0	0	0	0	0	0	0	0	0	0	0	0	0	0	0
	G 30	0	0	0	0	0	0	0	0	0	0	0	0	0	0	0	0	0	0	0	0
	G 31	0	0	0	0	0	0	0	0	0	0	0	0	0	0	0	0	0	0	0	0
	G 32	0	0	0	0	0	0	0	0	0	0	0	0	0	0
	G 33	0	0	0	0	0	0	0	0	0	0	0	0	0	0
	G 34	0	0	0	0	0	0	0	0	0	0	0	0	0	0	0	0	0
	G 35	0	0	0	0	0	0	0	0	0	0	0	0	0	0	0	0	0	0	0	0	0	0
	G 36	0	0	0	0	0	0	0	0	0	0	0	0	0	0	0	0	0	0	0	0	0	0
	G 37	0	0	0	0	0	0	0	0	0	0	0	0	0	0	0	0	0	0	0	0	0	0
	G 38	0	0	0	0	0	0	0	0	0	0	0	0	0	0	0	0	0	0	0	0	0	0	0	0
	G 39	0	0	0	0	0	0	0	0	0	0	0	0	0	0	0	0	0	0	0	0	0	0	0	0
	G 40	0	0	0	0	0	0	0	0	0	0	0	0	0	0	0	0	0	0	0	0	0	0	0	0
Nutritional status	G 26	0	0	0	0	0	0	0	0	0	0	0	0	0	0
	G 27	0	0	0	0	0	0	0	0	0	0	0	0	0	0	0	0	0
	G 28	0	0	0	0	0	0	0	0	0	0	0	0	0	0	0	0	0
	G 29	0	0	0	0	0	0	0	0	0	0	0	0	0	0	0	0	0	0	0	0
	G 30	0	0	0	0	0	0	0	0	0	0	0	0	0	0	0	0	0	0	0	0
	G 31	0	0	0	0	0	0	0	0	0	0	0	0	0	0	0	0	0	0	0	0
	G 32	0	0	0	0	0	0	0	0	0	0	0	0	0	0
	G 33	0	0	0	0	0	0	0	0	0	0	0	0	0	0
	G 34	0	0	0	0	0	0	0	0	0	0	0	0	0	0	0	0	0
	G 35	0	0	0	0	0	0	0	0	0	0	0	0	0	0	0	0	0	0	0	0	0	0
	G 36	0	0	0	0	0	0	0	0	0	0	0	0	0	0	0	0	0	0	0	0	0	0
	G 37	0	0	0	0	0	0	0	0	0	0	0	0	0	0	0	0	0	0	0	0	0	0
	G 38	0	0	0	0	0	0	0	0	0	0	0	0	0	0	0	0	0	0	0	0	0	0	0	0
	G 39	0	0	0	0	0	0	0	0	0	0	0	0	0	0	0	0	0	0	0	0	0	0	0	0
	G 40	0	0	0	0	0	0	0	0	0	0	0	0	0	0	0	0	0	0	0	0	0	0	0	0
	USUV	´-1 dpi	0 dpi	2 dpi	3 dpi	4 dpi	5 dpi	7 dpi	10 dpi	13 dpi	16 dpi	21 dpi	28 dpi	37 dpi
Eyes	G 20	0	0	0	0	0	0	0
	G 21	0	0	0	0	0	0	0
	G 22	0	0	0	0	0	0	0
	G 23	0	0	0	0	0	0	0	0	0	0	0	0	0
	G 24	0	0	0	0	0	0	0	0	0	0	0	0	0
	G 25	0	0	0	0	0	0	0	0	0	0	0	0	0
Nutritional status	G 20	0	0	0	0	0	0	0
	G 21	0	0	0	0	0	0	0
	G 22	0	0	0	0	0	0	0
	G 23	0	0	0	0	0	0	0	0	0	0	0	0	0
	G 24	0	0	0	0	0	0	0	0	0	0	0	0	0
	G 25	0	0	0	0	0	0	0	0	0	0	0	0	0
	USUV	0 dpi	6 dpi	15 dpi	22 dpi	30 dpi	36 dpi
Eyes	G 41	0	0	0	0	0	0
	G 42	0	0	0	0	0	0
	G 43	0	0	0	0	0	0
Nutritional status	G 41	0	0	0	0	0	0
	G 42	0	0	0	0	0	0
	G 43	0	0	0	0	0	0
dpi = days post infection

## Sheet: S3
Table S3.
Results of USUV RT-qPCR of blood cruor of all infected geese indicated as Ct values, copies/µL total RNA, and copies/mg blood cruor
dpi USUV	-1			2			3			4			5			7			10			13			16			18			19			20			21			22			23			27/28			31
dpi WNV																												1			2			3			4			5			6			10/11			14
Geese	Ct value	copies/µL total RNA	copies/mg blood cruor	Ct value	copies/µL total RNA	copies/mg blood cruor	Ct value	copies/µL total RNA	copies/mg blood cruor	Ct value	copies/µL total RNA	copies/mg blood cruor	Ct value	copies/µL total RNA	copies/mg blood cruor	Ct value	copies/µL total RNA	copies/mg blood cruor	Ct value	copies/µL total RNA	copies/mg blood cruor	Ct value	copies/µL total RNA	copies/mg blood cruor	Ct value	copies/µL total RNA	copies/mg blood cruor	Ct value	copies/µL total RNA	copies/mg blood cruor	Ct value	copies/µL total RNA	copies/mg blood cruor	Ct value	copies/µL total RNA	copies/mg blood cruor	Ct value	copies/µL total RNA	copies/mg blood cruor	Ct value	copies/µL total RNA	copies/mg blood cruor	Ct value	copies/µL total RNA	copies/mg blood cruor	Ct value	copies/µL total RNA	copies/mg blood cruor	Ct value
G 20	N/A	N/A	N/A	38.52	1.67933	3.91844	n.s.	n.s.	n.s.	N/A	N/A	N/A	n.s.	n.s.	n.s.	N/A	N/A	N/A	†	†	†	†	†	†	†	†	†	†	†	†	†	†	†	†	†	†	†	†	†	†	†	†	†	†	†	†	†	†	†
G 21	N/A	N/A	N/A	37.74	5.5712	12.9995	n.s.	n.s.	n.s.	N/A	N/A	N/A	n.s.	n.s.	n.s.	N/A	N/A	N/A	†	†	†	†	†	†	†	†	†	†	†	†	†	†	†	†	†	†	†	†	†	†	†	†	†	†	†	†	†	†	†
G 22	N/A	N/A	N/A	34.97	22.974	32.1636	n.s.	n.s.	n.s.	39.3	1.6258	2.84515	n.s.	n.s.	n.s.	N/A	N/A	N/A	†	†	†	†	†	†	†	†	†	†	†	†	†	†	†	†	†	†	†	†	†	†	†	†	†	†	†	†	†	†	†
G 23	N/A	N/A	N/A	N/A	N/A	N/A	n.s.	n.s.	n.s.	N/A	N/A	N/A	n.s.	n.s.	n.s.	n.s.	n.s.	n.s.	N/A	N/A	N/A	n.s.	n.s.	n.s.	N/A	N/A	N/A	n.s.	n.s.	n.s.	n.s.	n.s.	n.s.	n.s.	n.s.	n.s.	N/A	N/A	N/A	n.s.	n.s.	n.s.	n.s.	n.s.	n.s.	N/A	N/A	N/A	n.s.
G 24	N/A	N/A	N/A	38.64	2.0112	3.5196	n.s.	n.s.	n.s.	N/A	N/A	N/A	n.s.	n.s.	n.s.	n.s.	n.s.	n.s.	N/A	N/A	N/A	n.s.	n.s.	n.s.	N/A	N/A	N/A	n.s.	n.s.	n.s.	n.s.	n.s.	n.s.	n.s.	n.s.	n.s.	N/A	N/A	N/A	n.s.	n.s.	n.s.	n.s.	n.s.	n.s.	N/A	N/A	N/A	n.s.
G 25	N/A	N/A	N/A	38.65	1.3156	4.6046	n.s.	n.s.	n.s.	N/A	N/A	N/A	n.s.	n.s.	n.s.	n.s.	n.s.	n.s.	N/A	N/A	N/A	n.s.	n.s.	n.s.	N/A	N/A	N/A	n.s.	n.s.	n.s.	n.s.	n.s.	n.s.	n.s.	n.s.	n.s.	N/A	N/A	N/A	n.s.	n.s.	n.s.	n.s.	n.s.	n.s.	N/A	N/A	N/A	n.s.
G 26	N/A	N/A	N/A	39.895	0.648	2.268	n.s.	n.s.	n.s.	39.015	1.2268	2.86253	n.s.	n.s.	n.s.	n.s.	n.s.	n.s.	N/A	N/A	N/A	n.s.	n.s.	n.s.	N/A	N/A	N/A	N/A	N/A	N/A	n.s.	n.s.	n.s.	N/A	N/A	N/A	†	†	†	†	†	†	†	†	†	†	†	†	†
G 27	N/A	N/A	N/A	35.705	14.294	33.3527	n.s.	n.s.	n.s.	N/A	N/A	N/A	n.s.	n.s.	n.s.	n.s.	n.s.	n.s.	37.375	8.5423	29.898	n.s.	n.s.	n.s.	N/A	N/A	N/A	N/A	N/A	N/A	n.s.	n.s.	n.s.	N/A	N/A	N/A	n.s.	n.s.	n.s.	N/A	N/A	N/A	N/A	N/A	N/A	†	†	†	†
G 28	N/A	N/A	N/A	N/A	N/A	N/A	n.s.	n.s.	n.s.	N/A	N/A	N/A	n.s.	n.s.	n.s.	n.s.	n.s.	n.s.	N/A	N/A	N/A	n.s.	n.s.	n.s.	N/A	N/A	N/A	N/A	N/A	N/A	n.s.	n.s.	n.s.	N/A	N/A	N/A	n.s.	n.s.	n.s.	N/A	N/A	N/A	N/A	N/A	N/A	†	†	†	†
G 29	N/A	N/A	N/A	35.63	13.544	23.702	n.s.	n.s.	n.s.	N/A	N/A	N/A	n.s.	n.s.	n.s.	n.s.	n.s.	n.s.	N/A	N/A	N/A	n.s.	n.s.	n.s.	N/A	N/A	N/A	N/A	N/A	N/A	n.s.	n.s.	n.s.	N/A	N/A	N/A	n.s.	n.s.	n.s.	N/A	N/A	N/A	n.s.	n.s.	n.s.	N/A	N/A	N/A	†
G 30	N/A	N/A	N/A	N/A	N/A	N/A	n.s.	n.s.	n.s.	N/A	N/A	N/A	n.s.	n.s.	n.s.	n.s.	n.s.	n.s.	N/A	N/A	N/A	n.s.	n.s.	n.s.	N/A	N/A	N/A	N/A	N/A	N/A	n.s.	n.s.	n.s.	N/A	N/A	N/A	n.s.	n.s.	n.s.	N/A	N/A	N/A	n.s.	n.s.	n.s.	N/A	N/A	N/A	†
G 31	N/A	N/A	N/A	n.s.	n.s.	n.s.	N/A	N/A	N/A	n.s.	n.s.	n.s.	N/A	N/A	N/A	n.s.	n.s.	n.s.	N/A	N/A	N/A	n.s.	n.s.	n.s.	N/A	N/A	N/A	N/A	N/A	N/A	n.s.	n.s.	n.s.	N/A	N/A	N/A	n.s.	n.s.	n.s.	N/A	N/A	N/A	n.s.	n.s.	n.s.	N/A	N/A	N/A	†
G 32	N/A	N/A	N/A	n.s.	n.s.	n.s.	N/A	N/A	N/A	n.s.	n.s.	n.s.	N/A	N/A	N/A	n.s.	n.s.	n.s.	n.s.	n.s.	n.s.	N/A	N/A	N/A	N/A	N/A	N/A	N/A	N/A	N/A	n.s.	n.s.	n.s.	N/A	N/A	N/A	†	†	†	†	†	†	†	†	†	†	†	†	†
G 33	N/A	N/A	N/A	n.s.	n.s.	n.s.	N/A	N/A	N/A	n.s.	n.s.	n.s.	N/A	N/A	N/A	n.s.	n.s.	n.s.	n.s.	n.s.	n.s.	N/A	N/A	N/A	N/A	N/A	N/A	n.s.	n.s.	n.s.	N/A	N/A	N/A	N/A	N/A	N/A	†	†	†	†	†	†	†	†	†	†	†	†	†
G 34	N/A	N/A	N/A	n.s.	n.s.	n.s.	36.24	8.391	19.579	n.s.	n.s.	n.s.	N/A	N/A	N/A	n.s.	n.s.	n.s.	n.s.	n.s.	n.s.	N/A	N/A	N/A	N/A	N/A	N/A	n.s.	n.s.	n.s.	N/A	N/A	N/A	N/A	N/A	N/A	N/A	N/A	N/A	n.s.	n.s.	n.s.	N/A	N/A	N/A	†	†	†	†
G 35	N/A	N/A	N/A	n.s.	n.s.	n.s.	39.45	1.3061	4.57135	n.s.	n.s.	n.s.	N/A	N/A	N/A	n.s.	n.s.	n.s.	n.s.	n.s.	n.s.	N/A	N/A	N/A	N/A	N/A	N/A	n.s.	n.s.	n.s.	N/A	N/A	N/A	n.s.	n.s.	n.s.	N/A	N/A	N/A	n.s.	n.s.	n.s.	N/A	N/A	N/A	N/A	N/A	N/A	N/A
G 36	N/A	N/A	N/A	n.s.	n.s.	n.s.	40.69	0.3102	0.7238	n.s.	n.s.	n.s.	N/A	N/A	N/A	n.s.	n.s.	n.s.	n.s.	n.s.	n.s.	N/A	N/A	N/A	N/A	N/A	N/A	n.s.	n.s.	n.s.	N/A	N/A	N/A	n.s.	n.s.	n.s.	N/A	N/A	N/A	n.s.	n.s.	n.s.	N/A	N/A	N/A	N/A	N/A	N/A	N/A
G 37	N/A	N/A	N/A	n.s.	n.s.	n.s.	N/A	N/A	N/A	n.s.	n.s.	n.s.	N/A	N/A	N/A	n.s.	n.s.	n.s.	n.s.	n.s.	n.s.	N/A	N/A	N/A	N/A	N/A	N/A	n.s.	n.s.	n.s.	N/A	N/A	N/A	n.s.	n.s.	n.s.	N/A	N/A	N/A	n.s.	n.s.	n.s.	N/A	N/A	N/A	N/A	N/A	N/A	N/A
G 38	N/A	N/A	N/A	n.s.	n.s.	n.s.	N/A	N/A	N/A	n.s.	n.s.	n.s.	N/A	N/A	N/A	n.s.	n.s.	n.s.	n.s.	n.s.	n.s.	N/A	N/A	N/A	N/A	N/A	N/A	n.s.	n.s.	n.s.	N/A	N/A	N/A	n.s.	n.s.	n.s.	N/A	N/A	N/A	n.s.	n.s.	n.s.	N/A	N/A	N/A	N/A	N/A	N/A	N/A
G 39	N/A	N/A	N/A	n.s.	n.s.	n.s.	N/A	N/A	N/A	n.s.	n.s.	n.s.	N/A	N/A	N/A	n.s.	n.s.	n.s.	n.s.	n.s.	n.s.	N/A	N/A	N/A	N/A	N/A	N/A	n.s.	n.s.	n.s.	N/A	N/A	N/A	n.s.	n.s.	n.s.	N/A	N/A	N/A	n.s.	n.s.	n.s.	N/A	N/A	N/A	N/A	N/A	N/A	N/A
G 40	N/A	N/A	N/A	n.s.	n.s.	n.s.	N/A	N/A	N/A	n.s.	n.s.	n.s.	N/A	N/A	N/A	n.s.	n.s.	n.s.	n.s.	n.s.	n.s.	N/A	N/A	N/A	N/A	N/A	N/A	n.s.	n.s.	n.s.	N/A	N/A	N/A	n.s.	n.s.	n.s.	N/A	N/A	N/A	n.s.	n.s.	n.s.	N/A	N/A	N/A	N/A	N/A	N/A	N/A
Ct = Cycle threshold
dpi = days post infection
n.s. = no sample due to sampling scheme
†= already removed from the experiment
[truncated: 5 more columns]

## Sheet: S4
Table S4.
Results of serum titration of RT-qPCR-positive blood cruors in TCID50/mL
dpi USUV	2	3	4	5	7	10		20
dpi WNV								3
Geese	TCID50/mL Serum	TCID50/mL Serum	TCID50/mL Serum	TCID50/mL Serum	TCID50/mL Serum	TCID50/mL Serum		TCID50/mL Serum
G 20	421.697	n.s.	n.d.	n.s.	n.d.	†		†
G 21	n.e.	n.s.	n.d.	n.s.	n.d.	†		†
G 22	n.e.	n.s.	neg.	n.s.	n.d.	†		†
G 23	n.d.	n.s.	n.d.	n.s.	n.s.	n.d.		n.s.
G 24	n.e.	n.s.	n.d.	n.s.	n.s.	n.d.		n.s.
G 25	316.228	n.s.	n.d.	n.s.	n.s.	n.d.		n.s.
G 26	neg.	n.s.	neg.	n.s.	n.s.	n.d.		n.d.
G 27	n.e.	n.s.	n.d.	n.s.	n.s.	neg.		n.d.
G 28	n.d.	n.s.	n.d.	n.s.	n.s.	n.d.		n.d.
G 29	neg.	n.s.	n.d.	n.s.	n.s.	n.d.		n.d.
G 30	n.d.	n.s.	n.d.	n.s.	n.s.	n.d.		n.d.
G 31	n.s.	n.d.	n.s.	n.d.	n.s.	n.d.		n.e.
G 32	n.s.	n.d.	n.s.	n.d.	n.s.	n.s.		n.d.
G 33	n.s.	n.d.	n.s.	n.d.	n.s.	n.s.		n.e.
G 34	n.s.	n.e.	n.s.	n.d.	n.s.	n.s.		n.d.
G 35	n.s.	n.e.	n.s.	n.d.	n.s.	n.s.		n.s.
G 36	n.s.	n.e.	n.s.	n.d.	n.s.	n.s.		n.s.
G 37	n.s.	n.d.	n.s.	n.d.	n.s.	n.s.		n.s.
G 38	n.s.	n.d.	n.s.	n.d.	n.s.	n.s.		n.s.
G 39	n.s.	n.d.	n.s.	n.d.	n.s.	n.s.		n.s.
G 40	n.s.	n.d.	n.s.	n.d.	n.s.	n.s.		n.s.
dpi = days post infection
neg. = negative result
n.e. = low cytopathic cell variations not sufficient to determine titer
n.d. = not done due to negative RT-qPCR result
TCID = tissue culture infective dose
†= already removed from the experiment
n.s. = no sample due to sampling scheme

## Sheet: S5
Table S5.
Results of USUV RT-qPCR of swabs of all infected geese indicated as Ct values and copies/µL total RNA
dpi USUV	-1		2		3		4		5		7		10		13		16		18		19		20		21		22		23		24		25		27/28		29		31		37/38
dpi WNV																			1		2		3		4		5		6		7		8		10/11		12		14		20/21
oropharyngeal	Ct value	copies/µL total RNA	Ct value	copies/µL total RNA	Ct value	copies/µL total RNA	Ct value	copies/µL total RNA	Ct value	copies/µL total RNA	Ct value	copies/µL total RNA	Ct value	copies/µL total RNA	Ct value	copies/µL total RNA	Ct value	copies/µL total RNA	Ct value	copies/µL total RNA	Ct value	copies/µL total RNA	Ct value	copies/µL total RNA	Ct value	copies/µL total RNA	Ct value	copies/µL total RNA	Ct value	copies/µL total RNA	Ct value	copies/µL total RNA	Ct value	copies/µL total RNA	Ct value	copies/µL total RNA	Ct value	copies/µL total RNA	Ct value	copies/µL total RNA	Ct value	copies/µL total RNA
G 20	N/A	N/A	N/A	N/A	n.s.	n.s.	33.405	63.33	n.s.	n.s.	N/A	N/A	†	†	†	†	†	†	†	†	†	†	†	†	†	†	†	†	†	†	†	†	†	†	†	†	†	†	†	†	†	†
G 21	N/A	N/A	N/A	N/A	n.s.	n.s.	34.29	35.45	n.s.	n.s.	N/A	N/A	†	†	†	†	†	†	†	†	†	†	†	†	†	†	†	†	†	†	†	†	†	†	†	†	†	†	†	†	†	†
G 22	N/A	N/A	N/A	N/A	n.s.	n.s.	33.455	78.48	n.s.	n.s.	N/A	N/A	†	†	†	†	†	†	†	†	†	†	†	†	†	†	†	†	†	†	†	†	†	†	†	†	†	†	†	†	†	†
G 23	N/A	N/A	36.615	8.44	n.s.	n.s.	32.34	153.28	n.s.	n.s.	N/A	N/A	N/A	N/A	n.s.	n.s.	N/A	N/A	n.s.	n.s.	n.s.	n.s.	n.s.	n.s.	N/A	N/A	n.s.	n.s.	n.s.	n.s.	n.s.	n.s.	n.s.	n.s.	N/A	N/A	n.s.	n.s.	n.s.	n.s.	N/A	N/A
G 24	N/A	N/A	38.3	2.7563	n.s.	n.s.	N/A	N/A	n.s.	n.s.	N/A	N/A	N/A	N/A	n.s.	n.s.	N/A	N/A	n.s.	n.s.	n.s.	n.s.	n.s.	n.s.	N/A	N/A	n.s.	n.s.	n.s.	n.s.	n.s.	n.s.	n.s.	n.s.	N/A	N/A	n.s.	n.s.	n.s.	n.s.	N/A	N/A
G 25	N/A	N/A	N/A	N/A	n.s.	n.s.	N/A	N/A	n.s.	n.s.	N/A	N/A	N/A	N/A	n.s.	n.s.	N/A	N/A	n.s.	n.s.	n.s.	n.s.	n.s.	n.s.	N/A	N/A	n.s.	n.s.	n.s.	n.s.	n.s.	n.s.	n.s.	n.s.	N/A	N/A	n.s.	n.s.	n.s.	n.s.	N/A	N/A
G 26	N/A	N/A	N/A	N/A	n.s.	n.s.	34.915	23.963	n.s.	n.s.	37.585	3.5824	N/A	N/A	n.s.	n.s.	N/A	N/A	N/A	N/A	N/A	N/A	N/A	N/A	†	†	†	†	†	†	†	†	†	†	†	†	†	†	†	†	†	†
G 27	N/A	N/A	35.695	15.561	n.s.	n.s.	35.925	18.918	n.s.	n.s.	N/A	N/A	N/A	N/A	n.s.	n.s.	N/A	N/A	N/A	N/A	N/A	N/A	N/A	N/A	N/A	N/A	N/A	N/A	N/A	N/A	†	†	†	†	†	†	†	†	†	†	†	†
G 28	N/A	N/A	N/A	N/A	n.s.	n.s.	38.02	1.8095	n.s.	n.s.	N/A	N/A	N/A	N/A	n.s.	n.s.	N/A	N/A	N/A	N/A	N/A	N/A	N/A	N/A	N/A	N/A	N/A	N/A	N/A	N/A	†	†	†	†	†	†	†	†	†	†	†	†
G 29	N/A	N/A	38.09	1.7488	n.s.	n.s.	35.78	12.088	n.s.	n.s.	N/A	N/A	N/A	N/A	n.s.	n.s.	N/A	N/A	N/A	N/A	N/A	N/A	N/A	N/A	N/A	N/A	N/A	N/A	N/A	N/A	N/A	N/A	N/A	N/A	N/A	N/A	†	†	†	†	†	†
G 30	N/A	N/A	N/A	N/A	n.s.	n.s.	N/A	N/A	n.s.	n.s.	N/A	N/A	N/A	N/A	n.s.	n.s.	N/A	N/A	N/A	N/A	N/A	N/A	N/A	N/A	N/A	N/A	N/A	N/A	N/A	N/A	N/A	N/A	N/A	N/A	N/A	N/A	†	†	†	†	†	†
G 31	N/A	N/A	n.s.	n.s.	N/A	N/A	n.s.	n.s.	38.525	1.2939	N/A	N/A	N/A	N/A	n.s.	n.s.	N/A	N/A	N/A	N/A	N/A	N/A	N/A	N/A	N/A	N/A	N/A	N/A	N/A	N/A	N/A	N/A	N/A	N/A	N/A	N/A	†	†	†	†	†	†
G 32	N/A	N/A	n.s.	n.s.	N/A	N/A	n.s.	n.s.	N/A	N/A	N/A	N/A	n.s.	n.s.	N/A	N/A	N/A	N/A	N/A	N/A	N/A	N/A	N/A	N/A	†	†	†	†	†	†	†	†	†	†	†	†	†	†	†	†	†	†
G 33	N/A	N/A	n.s.	n.s.	N/A	N/A	n.s.	n.s.	N/A	N/A	N/A	N/A	n.s.	n.s.	N/A	N/A	N/A	N/A	N/A	N/A	N/A	N/A	N/A	N/A	†	†	†	†	†	†	†	†	†	†	†	†	†	†	†	†	†	†
G 34	N/A	N/A	n.s.	n.s.	34.9	25.814	n.s.	n.s.	N/A	N/A	N/A	N/A	n.s.	n.s.	N/A	N/A	N/A	N/A	N/A	N/A	N/A	N/A	N/A	N/A	N/A	N/A	N/A	N/A	N/A	N/A	†	†	†	†	†	†	†	†	†	†	†	†
G 35	N/A	N/A	n.s.	n.s.	36.435	8.409	n.s.	n.s.	N/A	N/A	N/A	N/A	n.s.	n.s.	N/A	N/A	N/A	N/A	N/A	N/A	N/A	N/A	N/A	N/A	N/A	N/A	N/A	N/A	N/A	N/A	N/A	N/A	N/A	N/A	N/A	N/A	N/A	N/A	N/A	N/A	†	†
G 36	N/A	N/A	n.s.	n.s.	N/A	N/A	n.s.	n.s.	N/A	N/A	N/A	N/A	n.s.	n.s.	N/A	N/A	N/A	N/A	N/A	N/A	N/A	N/A	N/A	N/A	N/A	N/A	N/A	N/A	N/A	N/A	N/A	N/A	N/A	N/A	N/A	N/A	N/A	N/A	N/A	N/A	†	†
G 37	N/A	N/A	n.s.	n.s.	35.49	11.8613	n.s.	n.s.	N/A	N/A	N/A	N/A	n.s.	n.s.	N/A	N/A	N/A	N/A	N/A	N/A	N/A	N/A	N/A	N/A	N/A	N/A	N/A	N/A	N/A	N/A	N/A	N/A	N/A	N/A	N/A	N/A	N/A	N/A	N/A	N/A	†	†
G 38	N/A	N/A	n.s.	n.s.	36.005	8.937	n.s.	n.s.	36.815	5.552	N/A	N/A	n.s.	n.s.	N/A	N/A	N/A	N/A	N/A	N/A	N/A	N/A	N/A	N/A	N/A	N/A	N/A	N/A	N/A	N/A	N/A	N/A	N/A	N/A	N/A	N/A	N/A	N/A	N/A	N/A	N/A	N/A
G 39	N/A	N/A	n.s.	n.s.	37.57	2.5177	n.s.	n.s.	N/A	N/A	N/A	N/A	n.s.	n.s.	N/A	N/A	N/A	N/A	N/A	N/A	N/A	N/A	N/A	N/A	N/A	N/A	N/A	N/A	N/A	N/A	N/A	N/A	N/A	N/A	N/A	N/A	N/A	N/A	N/A	N/A	N/A	N/A
G 40	N/A	N/A	n.s.	n.s.	36.62	5.294	n.s.	n.s.	N/A	N/A	N/A	N/A	n.s.	n.s.	N/A	N/A	N/A	N/A	N/A	N/A	N/A	N/A	N/A	N/A	N/A	N/A	N/A	N/A	N/A	N/A	N/A	N/A	N/A	N/A	N/A	N/A	N/A	N/A	N/A	N/A	N/A	N/A
dpi USUV	-1		2		3		4		5		7		10		13		16		18		19		20		21		22		23		24		25		27/28		29		31		37/38
dpi WNV																			1		2		3		4		5		6		7		8		10/11		12		14		20/21
cloacal	Ct value	copies/µL total RNA	Ct value	copies/µL total RNA	Ct value	copies/µL total RNA	Ct value	copies/µL total RNA	Ct value	copies/µL total RNA	Ct value	copies/µL total RNA	Ct value	copies/µL total RNA	Ct value	copies/µL total RNA	Ct value	copies/µL total RNA	Ct value	copies/µL total RNA	Ct value	copies/µL total RNA	Ct value	copies/µL total RNA	Ct value	copies/µL total RNA	Ct value	copies/µL total RNA	Ct value	copies/µL total RNA	Ct value	copies/µL total RNA	Ct value	copies/µL total RNA	Ct value	copies/µL total RNA	Ct value	copies/µL total RNA	Ct value	copies/µL total RNA	Ct value	copies/µL total RNA
G 20	N/A	N/A	36.16	12.648	n.s.	n.s.	N/A	N/A	n.s.	n.s.	N/A	N/A	†	†	†	†	†	†	†	†	†	†	†	†	†	†	†	†	†	†	†	†	†	†	†	†	†	†	†	†	†	†
G 21	N/A	N/A	N/A	N/A	n.s.	n.s.	N/A	N/A	n.s.	n.s.	N/A	N/A	†	†	†	†	†	†	†	†	†	†	†	†	†	†	†	†	†	†	†	†	†	†	†	†	†	†	†	†	†	†
G 22	N/A	N/A	N/A	N/A	n.s.	n.s.	N/A	N/A	n.s.	n.s.	N/A	N/A	†	†	†	†	†	†	†	†	†	†	†	†	†	†	†	†	†	†	†	†	†	†	†	†	†	†	†	†	†	†
G 23	N/A	N/A	N/A	N/A	n.s.	n.s.	N/A	N/A	n.s.	n.s.	N/A	N/A	N/A	N/A	n.s.	n.s.	N/A	N/A	n.s.	n.s.	n.s.	n.s.	n.s.	n.s.	N/A	N/A	n.s.	n.s.	n.s.	n.s.	n.s.	n.s.	n.s.	n.s.	N/A	N/A	n.s.	n.s.	n.s.	n.s.	N/A	N/A
G 24	N/A	N/A	N/A	N/A	n.s.	n.s.	N/A	N/A	n.s.	n.s.	37.205	3.059	N/A	N/A	n.s.	n.s.	N/A	N/A	n.s.	n.s.	n.s.	n.s.	n.s.	n.s.	N/A	N/A	n.s.	n.s.	n.s.	n.s.	n.s.	n.s.	n.s.	n.s.	N/A	N/A	n.s.	n.s.	n.s.	n.s.	N/A	N/A
G 25	N/A	N/A	N/A	N/A	n.s.	n.s.	N/A	N/A	n.s.	n.s.	N/A	N/A	N/A	N/A	n.s.	n.s.	N/A	N/A	n.s.	n.s.	n.s.	n.s.	n.s.	n.s.	N/A	N/A	n.s.	n.s.	n.s.	n.s.	n.s.	n.s.	n.s.	n.s.	N/A	N/A	n.s.	n.s.	n.s.	n.s.	N/A	N/A
G 26	N/A	N/A	N/A	N/A	n.s.	n.s.	N/A	N/A	n.s.	n.s.	N/A	N/A	N/A	N/A	n.s.	n.s.	N/A	N/A	N/A	N/A	N/A	N/A	N/A	N/A	†	†	†	†	†	†	†	†	†	†	†	†	†	†	†	†	†	†
G 27	N/A	N/A	N/A	N/A	n.s.	n.s.	N/A	N/A	n.s.	n.s.	N/A	N/A	N/A	N/A	n.s.	n.s.	N/A	N/A	N/A	N/A	N/A	N/A	N/A	N/A	n.s.	n.s.	N/A	N/A	N/A	N/A	†	†	†	†	†	†	†	†	†	†	†	†
G 28	N/A	N/A	N/A	N/A	n.s.	n.s.	N/A	N/A	n.s.	n.s.	37.0467	3.96207	N/A	N/A	n.s.	n.s.	N/A	N/A	N/A	N/A	N/A	N/A	N/A	N/A	n.s.	n.s.	N/A	N/A	N/A	N/A	†	†	†	†	†	†	†	†	†	†	†	†
G 29	N/A	N/A	N/A	N/A	n.s.	n.s.	N/A	N/A	n.s.	n.s.	N/A	N/A	N/A	N/A	n.s.	n.s.	N/A	N/A	N/A	N/A	N/A	N/A	N/A	N/A	n.s.	n.s.	N/A	N/A	N/A	N/A	N/A	N/A	N/A	N/A	N/A	N/A	†	†	†	†	†	†
G 30	N/A	N/A	N/A	N/A	n.s.	n.s.	N/A	N/A	n.s.	n.s.	N/A	N/A	N/A	N/A	n.s.	n.s.	N/A	N/A	N/A	N/A	N/A	N/A	N/A	N/A	n.s.	n.s.	N/A	N/A	N/A	N/A	N/A	N/A	N/A	N/A	N/A	N/A	†	†	†	†	†	†
G 31	N/A	N/A	n.s.	n.s.	N/A	N/A	n.s.	n.s.	32.3367	123.753	N/A	N/A	N/A	N/A	n.s.	n.s.	N/A	N/A	N/A	N/A	N/A	N/A	N/A	N/A	n.s.	n.s.	N/A	N/A	N/A	N/A	N/A	N/A	N/A	N/A	N/A	N/A	†	†	†	†	†	†
G 32	N/A	N/A	n.s.	n.s.	N/A	N/A	n.s.	n.s.	N/A	N/A	N/A	N/A	n.s.	n.s.	N/A	N/A	N/A	N/A	N/A	N/A	N/A	N/A	N/A	N/A	†	†	†	†	†	†	†	†	†	†	†	†	†	†	†	†	†	†
G 33	N/A	N/A	n.s.	n.s.	N/A	N/A	n.s.	n.s.	35.5167	19.4987	N/A	N/A	n.s.	n.s.	N/A	N/A	N/A	N/A	N/A	N/A	N/A	N/A	N/A	N/A	†	†	†	†	†	†	†	†	†	†	†	†	†	†	†	†	†	†
G 34	N/A	N/A	n.s.	n.s.	38.52	4.5627	n.s.	n.s.	33.81	40.6	N/A	N/A	n.s.	n.s.	N/A	N/A	N/A	N/A	N/A	N/A	N/A	N/A	N/A	N/A	N/A	N/A	N/A	N/A	N/A	N/A	†	†	†	†	†	†	†	†	†	†	†	†
G 35	N/A	N/A	n.s.	n.s.	N/A	N/A	n.s.	n.s.	N/A	N/A	N/A	N/A	n.s.	n.s.	N/A	N/A	N/A	N/A	N/A	N/A	N/A	N/A	N/A	N/A	N/A	N/A	N/A	N/A	N/A	N/A	N/A	N/A	N/A	N/A	N/A	N/A	N/A	N/A	N/A	N/A	†	†
G 36	N/A	N/A	n.s.	n.s.	N/A	N/A	n.s.	n.s.	36.39	7.08	N/A	N/A	n.s.	n.s.	N/A	N/A	N/A	N/A	N/A	N/A	N/A	N/A	N/A	N/A	N/A	N/A	N/A	N/A	N/A	N/A	N/A	N/A	N/A	N/A	N/A	N/A	N/A	N/A	N/A	N/A	†	†
G 37	N/A	N/A	n.s.	n.s.	N/A	N/A	n.s.	n.s.	34.87	18.4713	N/A	N/A	n.s.	n.s.	N/A	N/A	N/A	N/A	N/A	N/A	N/A	N/A	N/A	N/A	N/A	N/A	N/A	N/A	N/A	N/A	N/A	N/A	N/A	N/A	N/A	N/A	N/A	N/A	N/A	N/A	†	†
G 38	N/A	N/A	n.s.	n.s.	N/A	N/A	n.s.	n.s.	34.8133	21.398	N/A	N/A	n.s.	n.s.	N/A	N/A	N/A	N/A	N/A	N/A	N/A	N/A	N/A	N/A	N/A	N/A	N/A	N/A	N/A	N/A	N/A	N/A	N/A	N/A	N/A	N/A	N/A	N/A	N/A	N/A	N/A	N/A
G 39	N/A	N/A	n.s.	n.s.	N/A	N/A	n.s.	n.s.	N/A	N/A	N/A	N/A	n.s.	n.s.	N/A	N/A	N/A	N/A	N/A	N/A	N/A	N/A	N/A	N/A	N/A	N/A	N/A	N/A	N/A	N/A	N/A	N/A	N/A	N/A	N/A	N/A	N/A	N/A	N/A	N/A	N/A	N/A
G 40	N/A	N/A	n.s.	n.s.	N/A	N/A	n.s.	n.s.	N/A	N/A	N/A	N/A	n.s.	n.s.	N/A	N/A	N/A	N/A	N/A	N/A	N/A	N/A	N/A	N/A	N/A	N/A	N/A	N/A	N/A	N/A	N/A	N/A	N/A	N/A	N/A	N/A	N/A	N/A	N/A	N/A	N/A	N/A
Ct = Cycle threshold
dpi = days post infection
n.s. = no sample due to sampling scheme
†= already removed from the experiment

## Sheet: S6
Table S6.
Results of USUV RT-qPCR of organ homogenates of all infected geese indicated as Ct values, copies/µL total RNA, and copies/mg original organ
goose	dpi USUV	dpi WNV	Brain			Liver			Spleen			Heart			Bursa			Feather pulp			Kidney			Lung
			Ct value	copies/µL total RNA	copies/mg organ	Ct value	copies/µL total RNA	copies/mg organ	Ct value	copies/µL total RNA	copies/mg organ	Ct value	copies/µL total RNA	copies/mg organ	Ct value	copies/µL total RNA	copies/mg organ	Ct value	copies/µL total RNA	copies/mg organ	Ct value	copies/µL total RNA	copies/mg organ	Ct value	copies/µL total RNA	copies/mg organ
G 20	7		33.985	33.82	241.571	36.485	5.801	29.005	32.655	85.48	712.333	N/A	0	0	N/A	0	0	34.67	25.21	96.9615	39.205	0.9427	6.73357	N/A	0	0
G 21			37.445	3.2524	16.262	39.315	0.8882	8.882	31.205	234.4	2344	31.85	149.71	1069.36	N/A	0	0	N/A	0	0	N/A	0	0	38.285	2.1155	26.4437
G 22			N/A	0	0	38.37	1.9502	12.1887	32.01	133.16	832.25	36.715	6.544	54.5333	N/A	0	0	N/A	0	0	N/A	0	0	N/A	0	0
G 23	37		N/A	0	0	N/A	0	0	N/A	0	0	N/A	0	0	N/A	0	0	N/A	0	0	N/A	0	0	N/A	0	0
G 24			N/A	0	0	N/A	0	0	N/A	0	0	N/A	0	0	N/A	0	0	N/A	0	0	N/A	0	0	N/A	0	0
G 25			N/A	0	0	N/A	0	0	N/A	0	0	N/A	0	0	N/A	0	0	N/A	0	0	N/A	0	0	N/A	0	0
G 26	20	3	N/A	0	0	N/A	0	0	N/A	0	0	N/A	0	0	N/A	0	0	N/A	0	0	N/A	0	0	N/A	0	0
G 32			N/A	0	0	N/A	0	0	N/A	0	0	N/A	0	0	N/A	0	0	N/A	0	0	N/A	0	0	N/A	0	0
G 33			N/A	0	0	N/A	0	0	N/A	0	0	N/A	0	0	N/A	0	0	N/A	0	0	N/A	0	0	N/A	0	0
G 27	23	6	N/A	0	0	N/A	0	0	N/A	0	0	N/A	0	0	N/A	0	0	N/A	0	0	N/A	0	0	N/A	0	0
G 28			N/A	0	0	N/A	0	0	N/A	0	0	N/A	0	0	N/A	0	0	N/A	0	0	N/A	0	0	N/A	0	0
G 34			N/A	0	0	N/A	0	0	N/A	0	0	N/A	0	0	N/A	0	0	N/A	0	0	N/A	0	0	N/A	0	0
G 29	27	10	N/A	0	0	N/A	0	0	N/A	0	0	N/A	0	0	N/A	0	0	N/A	0	0	N/A	0	0	N/A	0	0
G 30			N/A	0	0	N/A	0	0	N/A	0	0	N/A	0	0	N/A	0	0	N/A	0	0	N/A	0	0	N/A	0	0
G 31			N/A	0	0	N/A	0	0	N/A	0	0	N/A	0	0	N/A	0	0	N/A	0	0	N/A	0	0	N/A	0	0
G 35	31	14	N/A	0	0	N/A	0	0	N/A	0	0	N/A	0	0	N/A	0	0	N/A	0	0	N/A	0	0	N/A	0	0
G 36			N/A	0	0	N/A	0	0	N/A	0	0	N/A	0	0	N/A	0	0	N/A	0	0	N/A	0	0	N/A	0	0
G 37			N/A	0	0	N/A	0	0	N/A	0	0	N/A	0	0	N/A	0	0	N/A	0	0	N/A	0	0	N/A	0	0
G 38	38	21	N/A	0	0	N/A	0	0	N/A	0	0	N/A	0	0	N/A	0	0	N/A	0	0	N/A	0	0	N/A	0	0
G 39			N/A	0	0	N/A	0	0	N/A	0	0	N/A	0	0	N/A	0	0	N/A	0	0	N/A	0	0	N/A	0	0
G 40			N/A	0	0	N/A	0	0	N/A	0	0	N/A	0	0	N/A	0	0	N/A	0	0	N/A	0	0	N/A	0	0
Ct = Cycle threshold
dpi = days post infection

## Sheet: S7
Table S7.
Results of titration of RT-qPCR-positive organ homogenates in TCID50/mL
goose	dpi USUV	dpi WNV	Brain	Liver	Spleen	Heart	Bursa	Feather pulp	Kidney	Lung
G 20	7		n.e.	n.e.	neg.	n.d.	n.d.	neg.	n.e.	n.d.
G 21			n.e.	neg.	neg.	neg.	n.d.	n.d.	n.d.	neg.
G 22			n.d.	n.e.	n.e.	n.e.	n.d.	n.d.	n.d.	n.d.
G 23	37		n.d.	n.d.	n.d.	n.d.	n.d.	n.d.	n.d.	n.d.
G 24			n.d.	n.d.	n.d.	n.d.	n.d.	n.d.	n.d.	n.d.
G 25			n.d.	n.d.	n.d.	n.d.	n.d.	n.d.	n.d.	n.d.
G 26	20	3	n.d.	n.e.	n.e.	n.d.	n.d.	n.e.	neg.	neg.
G 32			n.d.	neg.	neg.	n.d.	n.d.	n.d.	n.d.	n.d.
G 33			neg.	neg.	neg.	n.e.	n.d.	n.d.	neg.	n.d.
G 27	23	6	n.d.	n.d.	neg.	n.d.	n.d.	n.e.	n.d.	n.d.
G 28			n.d.	n.d.	n.d.	n.d.	n.d.	n.e.	n.d.	n.d.
G 34			n.d.	n.d.	neg.	n.d.	n.d.	n.d.	n.d.	n.d.
G 29	27	10	n.d.	n.d.	neg.	n.d.	n.d.	n.d.	n.d.	n.d.
G 30			n.d.	n.d.	n.d.	n.d.	n.d.	n.d.	n.d.	n.d.
G 31			n.d.	n.d.	neg.	n.d.	n.d.	n.d.	n.d.	n.d.
G 35	31	14	n.d.	n.d.	n.d.	n.d.	n.d.	n.d.	n.d.	n.d.
G 36			n.d.	n.d.	neg.	n.d.	n.d.	n.d.	n.d.	n.d.
G 37			n.d.	n.d.	neg.	n.d.	n.d.	n.d.	n.d.	n.d.
G 38	38	21	n.d.	n.d.	n.d.	n.d.	n.d.	n.d.	n.d.	n.d.
G 39			neg.	n.d.	n.d.	n.d.	n.d.	n.d.	n.d.	n.d.
G 40			neg.	n.d.	n.d.	n.d.	n.d.	n.d.	n.d.	n.d.
G 41			n.d.	n.d.	n.d.	n.d.	n.d.	n.d.	n.d.	n.d.
G 42			n.d.	n.d.	n.d.	n.d.	n.d.	n.d.	n.d.	n.d.
G 43			n.d.	n.d.	n.d.	n.d.	n.d.	n.d.	n.d.	n.d.
dpi = days post infection
neg. = negative result
n.e. = not evaluable, typical CPE only in individual wells and therefore not sufficient to calculate a viral titer
n.d. = not done due to negative RT-qPCR result
TCID = tissue culture infective dose

## Sheet: S8
Table S8.
Overview of the degree and distribution of the most important histopathologically detectable alterations in the USUV mono-infected geese (G 20-25), the USUV and subsequently WNV infected geese (G 26-40), and the controls (G 41-43)
goose	dpi USUV	dpi WNV	Encephalitis	Spleen	ENS	Gut wall	Myocarditis	Neuritis	Additional Findings
G 20	7		+	--#	+	+	--	--	--
G 21			++	--#	+/+	+/+	+*	--	Acute lymphohistiocytic myositis
G 22			++/+	--#	+/+	+	+	--	Mild lymphoplasmacytic pericholangitis
G 23	37		--	--#	(+)	--	--	--	Mild lymphoplasmacytic pericholangitis
G 24			(+)	--#	--	(+)	--	--	FHLS
G 25			--	--	--	(+)	(+)	--	Mild chronic-active lymphohistiocytic and lymphoplasmacytic pericholangitis
G 26	20	3	--	--	+	+	(+)	--	FHLS
G 32			++	Necrosis#	--	--	--	--	FHLS, mild acute lymphohisticytic nephritis, mild lymphoplasmacytic pericholangitis and hepatitis
G 33			+	--	--	--	+*	--	FHLS, mild lymphoplasmacytic pericholangitis, mild lymphohistiocytic nephritis, mild lymphohistiocytiv myositis
G 27	23	6	(+)	--	+/+	+/+	(+)*	--	FHLS
G 28			--	--#	+	+	+*	--	FHLS, mild lymphoplasmacytic pericholangitis, slight lymphohistiocytic myositis
G 34			+	--#	(+)	--	--	--	FHLS
G 29	27	10	+	--#	(+)	(+)	(+)	--	FHLS, slight lymphohistiocytic Hepatitis, slight lymphohistiocytic myositis
G 30			+	--#	--	--	--	--	FHLS, focally slight lymphohistiocytic cholangitis and hepatitis
G 31			(+)	--	--	--	--	--	--
G 35	31	14	(+)	--#	--	(+)	--	--	--
G 36			++	Necrosis#	--	(+)	(+)	(+)	Mild lymphoplasmacytic necrotising hepatitis
G 37			--	--#	--	(+)	--	--	--
G 38	38	21	+	--#	--	--	(+)	--	Focal lymphohistiocytic necrotising hepatitis
G 39			++	--	--	+	+	+	Mild lymphohistiocytic myositis, focal granulomatous gastritis
G 40			++	Necrosis	--	--	(+)	--	FHLS, focal mild subacute lymphoplasmacytic hepatitis
G 41			--	--	--	--	--	--	--
G 42			--	--	--	--	--	--	--
G 43			--	--	--	--	--	--	--
dpi = days post infection
ENS = Enteric Nervous System
Nerve = Peripheral nerve i.e. Plexus brachialis
-- = no histomorphological alteration visible
(+) = weak
+ = mild
`+(+) = mild to moderate
++ = moderate
Spleen/Necrosis= = fibrinoid necrosis of periarteriolar lymphsheats
# = follicular hyperplasia of the spleen
*slight necrotising component in myocarditis
FHLS = Fatty-Hemorrhagic-Liver Syndrom

## Sheet: S9
Table S9.
Overview of the degree and distribution of the most important histopathologically detectable alterations in the central nervous system of the USUV mono-infected geese (G 20-25), the USUV and subsequently WNV infected geese (G 26-40), and the controls (G 41-43)
goose	dpi USUV	dpi WNV	Brain stem	Cerebellum	Mesencephalon	Cerebrum	Remarks
G 20	7		--	--	(+)	+	--
G 21			++	--	--	++	--
G 22			+	+++	--	+	Most prominent in cerebellar white matte
G 23	37		--	--	--	--	--
G 24			--	--	--	(+)	--
G 25			--	--	--	--	--
G 26	20	3	--	--	--	--	Single glia nodules in mesencephalon / cerebrum
G 32			--	--	--	++	Scattered single cell necrosis (glia cells, neurons)
G 33			--	--	+	+	Scattered single cell necrosis (glia cells, neurons)
G 27	23	6	--	(+)	--	(+)	--
G 28			--	--	--	--	--
G 34			+	--	--	--	Oligofocal glia nodules in all brain areas
G 29	27	10	(+)	--	--	+	--
G 30			+	--	--	--	--
G 31			--	--	--	(+)	--
G 35	31	14	--	--	--	(+)	--
G 36			++	++	NA	++	Few plasma cells, single neuronal cell necrosis
G 37			--	--	--	--	--
G 38	38	21	+	+	--	(+)	--
G 39			++	++	+	+	Few plasma cells, axonal degeneration
G 40			--	+	++	++	Single cell necrosis (glial cells, neurons)
G 41			--	--	--	--	--
G 42			--	--	--	--	--
G 43			--	--	--	--	--
dpi = days post infection
-- = no histomorphological alteration visible
(+) = weak
+ = mild
`+(+) = mild to moderate
++ = moderate
NA = Not available

## Sheet: S10
Table S10.
Results of WNV RT-qPCR of blood cruors of all infected geese indicated as Ct values, copies/µL total RNA, and copies/mg blood cruor
dpi USUV	-1			2			3			4			5			7			10			13			16			18			19			20			21			22			23			27/28			31
dpi WNV																												1			2			3			4			5			6			10/11			14
Geese	Ct value	copies/µL total RNA	copies/mg blood cruor	Ct value	copies/µL total RNA	copies/mg blood cruor	Ct value	copies/µL total RNA	copies/mg blood cruor	Ct value	copies/µL total RNA	copies/mg blood cruor	Ct value	copies/µL total RNA	copies/mg blood cruor	Ct value	copies/µL total RNA	copies/mg blood cruor	Ct value	copies/µL total RNA	copies/mg blood cruor	Ct value	copies/µL total RNA	copies/mg blood cruor	Ct value	copies/µL total RNA	copies/mg blood cruor	Ct value	copies/µL total RNA	copies/mg blood cruor	Ct value	copies/µL total RNA	copies/mg blood cruor	Ct value	copies/µL total RNA	copies/mg blood cruor	Ct value	copies/µL total RNA	copies/mg blood cruor	Ct value	copies/µL total RNA	copies/mg blood cruor	Ct value	copies/µL total RNA	copies/mg blood cruor	Ct value	copies/µL total RNA	copies/mg blood cruor	Ct value
G 20	N/A	N/A	N/A	N/A	N/A	N/A	n.s.	n.s.	n.s.	N/A	N/A	N/A	n.s.	n.s.	n.s.	N/A	N/A	N/A	†	†	†	†	†	†	†	†	†	†	†	†	†	†	†	†	†	†	†	†	†	†	†	†	†	†	†	†	†	†	†
G 21	N/A	N/A	N/A	N/A	N/A	N/A	n.s.	n.s.	n.s.	N/A	N/A	N/A	n.s.	n.s.	n.s.	N/A	N/A	N/A	†	†	†	†	†	†	†	†	†	†	†	†	†	†	†	†	†	†	†	†	†	†	†	†	†	†	†	†	†	†	†
G 22	N/A	N/A	N/A	N/A	N/A	N/A	n.s.	n.s.	n.s.	N/A	N/A	N/A	n.s.	n.s.	n.s.	N/A	N/A	N/A	†	†	†	†	†	†	†	†	†	†	†	†	†	†	†	†	†	†	†	†	†	†	†	†	†	†	†	†	†	†	†
G 23	N/A	N/A	N/A	N/A	N/A	N/A	n.s.	n.s.	n.s.	N/A	N/A	N/A	n.s.	n.s.	n.s.	n.s.	n.s.	n.s.	N/A	N/A	N/A	n.s.	n.s.	n.s.	N/A	N/A	N/A	n.s.	n.s.	n.s.	n.s.	n.s.	n.s.	n.s.	n.s.	n.s.	N/A	N/A	N/A	n.s.	n.s.	n.s.	n.s.	n.s.	n.s.	N/A	N/A	N/A	n.s.
G 24	N/A	N/A	N/A	N/A	N/A	N/A	n.s.	n.s.	n.s.	N/A	N/A	N/A	n.s.	n.s.	n.s.	n.s.	n.s.	n.s.	N/A	N/A	N/A	n.s.	n.s.	n.s.	N/A	N/A	N/A	n.s.	n.s.	n.s.	n.s.	n.s.	n.s.	n.s.	n.s.	n.s.	N/A	N/A	N/A	n.s.	n.s.	n.s.	n.s.	n.s.	n.s.	N/A	N/A	N/A	n.s.
G 25	N/A	N/A	N/A	N/A	N/A	N/A	n.s.	n.s.	n.s.	N/A	N/A	N/A	n.s.	n.s.	n.s.	n.s.	n.s.	n.s.	N/A	N/A	N/A	n.s.	n.s.	n.s.	N/A	N/A	N/A	n.s.	n.s.	n.s.	n.s.	n.s.	n.s.	n.s.	n.s.	n.s.	N/A	N/A	N/A	n.s.	n.s.	n.s.	n.s.	n.s.	n.s.	N/A	N/A	N/A	n.s.
G 26	N/A	N/A	N/A	N/A	N/A	N/A	n.s.	n.s.	n.s.	N/A	N/A	N/A	n.s.	n.s.	n.s.	n.s.	n.s.	n.s.	N/A	N/A	N/A	n.s.	n.s.	n.s.	N/A	N/A	N/A	N/A	N/A	N/A	n.s.	n.s.	n.s.	N/A	N/A	N/A	†	†	†	†	†	†	†	†	†	†	†	†	†
G 27	N/A	N/A	N/A	N/A	N/A	N/A	n.s.	n.s.	n.s.	N/A	N/A	N/A	n.s.	n.s.	n.s.	n.s.	n.s.	n.s.	N/A	N/A	N/A	n.s.	n.s.	n.s.	N/A	N/A	N/A	N/A	N/A	N/A	n.s.	n.s.	n.s.	N/A	N/A	N/A	n.s.	n.s.	n.s.	N/A	N/A	N/A	N/A	N/A	N/A	†	†	†	†
G 28	N/A	N/A	N/A	N/A	N/A	N/A	n.s.	n.s.	n.s.	N/A	N/A	N/A	n.s.	n.s.	n.s.	n.s.	n.s.	n.s.	N/A	N/A	N/A	n.s.	n.s.	n.s.	N/A	N/A	N/A	N/A	N/A	N/A	n.s.	n.s.	n.s.	N/A	N/A	N/A	n.s.	n.s.	n.s.	N/A	N/A	N/A	N/A	N/A	N/A	†	†	†	†
G 29	N/A	N/A	N/A	N/A	N/A	N/A	n.s.	n.s.	n.s.	N/A	N/A	N/A	n.s.	n.s.	n.s.	n.s.	n.s.	n.s.	N/A	N/A	N/A	n.s.	n.s.	n.s.	N/A	N/A	N/A	N/A	N/A	N/A	n.s.	n.s.	n.s.	N/A	N/A	N/A	n.s.	n.s.	n.s.	N/A	N/A	N/A	n.s.	n.s.	n.s.	N/A	N/A	N/A	†
G 30	N/A	N/A	N/A	N/A	N/A	N/A	n.s.	n.s.	n.s.	N/A	N/A	N/A	n.s.	n.s.	n.s.	n.s.	n.s.	n.s.	N/A	N/A	N/A	n.s.	n.s.	n.s.	N/A	N/A	N/A	N/A	N/A	N/A	n.s.	n.s.	n.s.	N/A	N/A	N/A	n.s.	n.s.	n.s.	N/A	N/A	N/A	n.s.	n.s.	n.s.	N/A	N/A	N/A	†
G 31	N/A	N/A	N/A	n.s.	n.s.	n.s.	N/A	N/A	N/A	n.s.	n.s.	n.s.	N/A	N/A	N/A	n.s.	n.s.	n.s.	N/A	N/A	N/A	n.s.	n.s.	n.s.	N/A	N/A	N/A	N/A	N/A	N/A	n.s.	n.s.	n.s.	35.6467	0.260027	0.455047	n.s.	n.s.	n.s.	N/A	N/A	N/A	n.s.	n.s.	n.s.	N/A	N/A	N/A	†
G 32	N/A	N/A	N/A	n.s.	n.s.	n.s.	N/A	N/A	N/A	n.s.	n.s.	n.s.	N/A	N/A	N/A	n.s.	n.s.	n.s.	n.s.	n.s.	n.s.	N/A	N/A	N/A	N/A	N/A	N/A	N/A	N/A	N/A	n.s.	n.s.	n.s.	N/A	N/A	N/A	†	†	†	†	†	†	†	†	†	†	†	†	†
G 33	N/A	N/A	N/A	n.s.	n.s.	n.s.	N/A	N/A	N/A	n.s.	n.s.	n.s.	N/A	N/A	N/A	n.s.	n.s.	n.s.	n.s.	n.s.	n.s.	N/A	N/A	N/A	N/A	N/A	N/A	n.s.	n.s.	n.s.	N/A	N/A	N/A	34.1933	0.940447	6.58313	†	†	†	†	†	†	†	†	†	†	†	†	†
G 34	N/A	N/A	N/A	n.s.	n.s.	n.s.	N/A	N/A	N/A	n.s.	n.s.	n.s.	N/A	N/A	N/A	n.s.	n.s.	n.s.	n.s.	n.s.	n.s.	N/A	N/A	N/A	N/A	N/A	N/A	n.s.	n.s.	n.s.	N/A	N/A	N/A	N/A	N/A	N/A	N/A	N/A	N/A	n.s.	n.s.	n.s.	N/A	N/A	N/A	†	†	†	†
G 35	N/A	N/A	N/A	n.s.	n.s.	n.s.	N/A	N/A	N/A	n.s.	n.s.	n.s.	N/A	N/A	N/A	n.s.	n.s.	n.s.	n.s.	n.s.	n.s.	N/A	N/A	N/A	N/A	N/A	N/A	n.s.	n.s.	n.s.	N/A	N/A	N/A	n.s.	n.s.	n.s.	N/A	N/A	N/A	n.s.	n.s.	n.s.	N/A	N/A	N/A	N/A	N/A	N/A	N/A
G 36	N/A	N/A	N/A	n.s.	n.s.	n.s.	N/A	N/A	N/A	n.s.	n.s.	n.s.	N/A	N/A	N/A	n.s.	n.s.	n.s.	n.s.	n.s.	n.s.	N/A	N/A	N/A	N/A	N/A	N/A	n.s.	n.s.	n.s.	N/A	N/A	N/A	n.s.	n.s.	n.s.	N/A	N/A	N/A	n.s.	n.s.	n.s.	N/A	N/A	N/A	N/A	N/A	N/A	N/A
G 37	N/A	N/A	N/A	n.s.	n.s.	n.s.	N/A	N/A	N/A	n.s.	n.s.	n.s.	N/A	N/A	N/A	n.s.	n.s.	n.s.	n.s.	n.s.	n.s.	N/A	N/A	N/A	N/A	N/A	N/A	n.s.	n.s.	n.s.	N/A	N/A	N/A	n.s.	n.s.	n.s.	N/A	N/A	N/A	n.s.	n.s.	n.s.	N/A	N/A	N/A	N/A	N/A	N/A	N/A
G 38	N/A	N/A	N/A	n.s.	n.s.	n.s.	N/A	N/A	N/A	n.s.	n.s.	n.s.	N/A	N/A	N/A	n.s.	n.s.	n.s.	n.s.	n.s.	n.s.	N/A	N/A	N/A	N/A	N/A	N/A	n.s.	n.s.	n.s.	N/A	N/A	N/A	n.s.	n.s.	n.s.	N/A	N/A	N/A	n.s.	n.s.	n.s.	N/A	N/A	N/A	N/A	N/A	N/A	N/A
G 39	N/A	N/A	N/A	n.s.	n.s.	n.s.	N/A	N/A	N/A	n.s.	n.s.	n.s.	N/A	N/A	N/A	n.s.	n.s.	n.s.	n.s.	n.s.	n.s.	N/A	N/A	N/A	N/A	N/A	N/A	n.s.	n.s.	n.s.	N/A	N/A	N/A	n.s.	n.s.	n.s.	N/A	N/A	N/A	n.s.	n.s.	n.s.	N/A	N/A	N/A	N/A	N/A	N/A	N/A
G 40	N/A	N/A	N/A	n.s.	n.s.	n.s.	N/A	N/A	N/A	n.s.	n.s.	n.s.	N/A	N/A	N/A	n.s.	n.s.	n.s.	n.s.	n.s.	n.s.	N/A	N/A	N/A	N/A	N/A	N/A	n.s.	n.s.	n.s.	N/A	N/A	N/A	n.s.	n.s.	n.s.	N/A	N/A	N/A	n.s.	n.s.	n.s.	N/A	N/A	N/A	N/A	N/A	N/A	N/A
Ct = Cycle threshold
dpi = days post infection
n.s. = no sample due to sampling scheme
†= already removed from the experiment
[truncated: 5 more columns]

[truncated: 5 more sheets: S11, S12, S13, S14, S15]
